# Supplementary material for: Methylene Blue Reduces Fluid Loading and Norepinephrine Requirements for Post-Resuscitation Syndrome in a Pig Model of Refractory Cardiac Arrest Resuscitated with Veno-Arterial ECMO
Source: MDPI journal article supplement (doi:10.3390/jcm11092515), 2022-04-29
Supplement: s1 [file s1]

**Table S1.** Baseline characteristics of studied animals (T<sub>B</sub>).

|                                        | Standard Care (n = 9) | Methylene Blue (n = 9) | p    |
|----------------------------------------|-----------------------|------------------------|------|
| Weight (kg)                            | 61 (59 – 65)          | 60 (55 – 65)           | 0.37 |
| Heart rate (bpm)                       | 96 (90 – 105)         | 94 (90 – 107)          | 0.51 |
| MAP (mmHg)                             | 97 (93 – 111)         | 115 (110 – 120)        | 0.45 |
| pH                                     | 7.44 (7.42 – 7.49)    | 7.42 (7.40 – 7.49)     | 0.31 |
| PaCO <sub>2</sub> (mmHg)               | 42 (37 – 45)          | 47 (41 – 50)           | 0.19 |
| PaO <sub>2</sub> (mmHg)                | 179 (161 – 229)       | 128 (114 – 200)        | 0.18 |
| HCO <sub>3</sub> <sup>-</sup> (mmol/l) | 26 (26 – 27)          | 27 (26 – 28)           | 0.16 |
| Hemoglobin (g/dL)                      | 10.0 (9.5 – 11.2)     | 10.2 (9.6 – 10.5)      | 0.93 |
| Lactate (mmol/l)                       | 1.1 (1.0 – 1.5)       | 1.2 (1.1 – 1.3)        | 0.51 |
| ALAT (UI/L)                            | 45 (42 – 51)          | 50 (49 – 52)           | 0.34 |
| ASAT (UI/L)                            | 42 (32 – 45)          | 43 (37 – 67)           | 0.28 |
| Creatininemia (μmol/l)                 | 87 (77 – 91)          | 90 (89 – 100)          | 0.30 |
| Urea (mmol/l)                          | 3.4 (2.7 – 3.8)       | 3.2 (2.8 – 3.4)        | 0.59 |
| Proteins (g/L)                         | 53 (51 – 56)          | 56 (51 – 56)           | 0.41 |

MAP: mean arterial pressure. Data are presented as median (25<sup>th</sup> – 75<sup>th</sup> percentile). ALAT: alanine aminotransferase; ASAT: aspartate aminotransferase. Data are presented as median (25<sup>th</sup> – 75<sup>th</sup> percentile).

**Table S2.** Sublingual microcirculation parameters assessed by Microscan.

| Time                                  | Standard Care (n = 9) | Methylene Blue (n=9) | Standard vs MB |
|---------------------------------------|-----------------------|----------------------|----------------|
| <b>TVD (mm/mm<sup>2</sup>)</b>        |                       |                      |                |
| T <sub>B</sub>                        | 20.3 (19.7 – 26.2)    | 21.9 (19.8 – 23.7)   | p = 0.98       |
| T <sub>0</sub>                        | 20.6 (20.0 – 21.4)    | 20.2 (18.8 – 22.3)   | p = 0.90       |
| T <sub>3</sub>                        | 19.9 (18.5 – 20.2)    | 17.3 (15.5 – 20.8)   | p = 0.35       |
| T <sub>6</sub>                        | 20.8 (18.4 – 22.3)    | 20.1 (18.4 – 21.5)   | p = 0.84       |
| <b>T<sub>B</sub> vs T<sub>6</sub></b> | p = 0.51              | p = 0.34             |                |
| <b>PVD (mm/mm<sup>2</sup>)</b>        |                       |                      |                |
| T <sub>B</sub>                        | 21.1 (20.1 – 26.3)    | 21.6 (19.7 – 23.2)   | p = 0.79       |
| T <sub>0</sub>                        | 21.1 (19.8 – 21.1)    | 21.1 (20.6 – 23.9)   | p = 0.30       |
| T <sub>3</sub>                        | 19.8 (16.7 – 20.2)    | 18.7 (15.9 – 21.8)   | p = 0.59       |
| T <sub>6</sub>                        | 19.2 (18.3 – 20.9)    | 20.2 (19.3 – 21.7)   | p = 0.30       |
| <b>T<sub>B</sub> vs T<sub>6</sub></b> | p = 0.41              | p = 0.63             |                |
| <b>PPV (%)</b>                        |                       |                      |                |
| T <sub>B</sub>                        | 98.2 (96.1 – 99.6)    | 96.7 (95.7 – 98.1)   | p = 0.46       |
| T <sub>0</sub>                        | 97.2 (94.1 – 99.6)    | 99.4 (97.3 – 99.1)   | p = 0.83       |
| T <sub>3</sub>                        | 98.4 (88.1 – 99.4)    | 97.5 (95.1 – 98.3)   | p = 0.97       |
| T <sub>6</sub>                        | 97.7 (96.2 – 99.0)    | 98.8 (96.3 – 99.0)   | p = 0.95       |
| <b>T<sub>B</sub> vs T<sub>6</sub></b> | p = 0.21              | p = 0.55             |                |
| <b>MFI</b>                            |                       |                      |                |
| T <sub>B</sub>                        | 3.2 (3.0 – 3.5)       | 3.2 (3.9 – 3.2)      | p = 0.64       |
| T <sub>0</sub>                        | 2.5 (2.2 – 2.7)       | 2.5 (2.2 – 2.8)      | p = 0.83       |
| T <sub>3</sub>                        | 1.9 (1.2 – 2.2)       | 2.3 (1.8 – 3)        | p = 0.14       |
| T <sub>6</sub>                        | 2.2 (2.1 – 2.2)       | 2.4 (1.9 – 2.7)      | p = 0.62       |
| <b>T<sub>B</sub> vs T<sub>6</sub></b> | <b>p &lt; 0.05</b>    | <b>p &lt; 0.05</b>   |                |

T<sub>B</sub>: basal time; T<sub>0</sub>: start of VA-ECMO; T<sub>3</sub>: 3 hours after randomization; T<sub>6</sub>: 6 hours after randomization; TVD: total vessel density; PVD: perfused vessel density; PPV: percentage of perfused vessels; MFI: microvascular flow index. Standard vs. MB groups were compared with Mann-Whitney test and T<sub>B</sub> vs. T<sub>6</sub> was compared with Friedmann test. Data are presented as median (25<sup>th</sup> – 75<sup>th</sup> percentile).

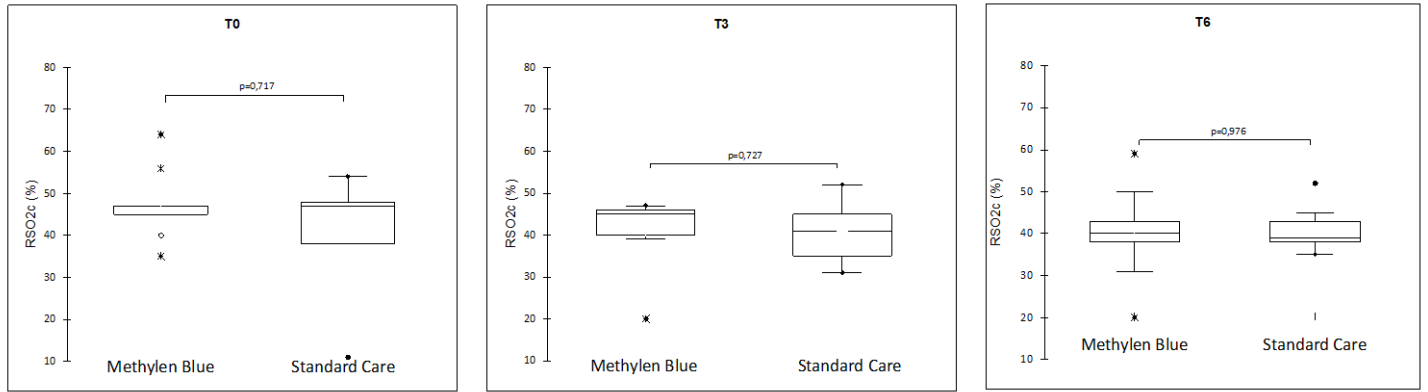

**Figure S1.** Regional cerebral tissue oxygen saturation (rSO2) in the right frontal lobe during the study. T<sub>0</sub>: start of VA-ECMO; T<sub>3</sub>: 3 hours after randomization; T<sub>6</sub>: 6 hours after randomization. Data are presented as median (25<sup>th</sup> – 75<sup>th</sup> percentile).
